# Supplementary material for: 悪性黒色腫に対するBCG療法 (癌のBCG免疫療法〔特集〕)
Source: MDPI journal article supplement (doi:10.3390/pharmaceutics15010181), 1978-08-01
Supplement: s1 [file s1]

**Supplementary Table S5.** Summary of two-way ANOVA results for ROS detection and natural products. The variables analyses were: type of fluorescence probe (“Probe”) and natural substances (“Natural”)

| Source        | Df | SS               | MS                | F       | p      | Partial Eta-Square |
|---------------|----|------------------|-------------------|---------|--------|--------------------|
| Probe         | 1  | 443454379201.389 | 443454379201..389 | 228.893 | <0.001 | 0.792              |
| Natural       | 2  | 126125468739.611 | 25225093747.922   | 13.020  | <0.001 | 0.520              |
| Probe*Natural | 2  | 32430327625.778  | 6486065525.156    | 3.348   | 0.010  | 0.218              |

df= degrees of freedom; SS= Sum of squares; MS= mean square; F= MS factor/ MS residual; p= probability of significance,  $\alpha= 0.050$ ; \*interaction between variables analyses
