# Supplementary material for: 悪性黒色腫に対するBCG療法 (癌のBCG免疫療法〔特集〕)
Source: MDPI journal article supplement (doi:10.3390/pharmaceutics15010181), 1978-08-01
Supplement: s1 [file s1]

**Supplementary Table S6.** Correlation study about formation of hydroxyl radical in photosensitizers and log-reduction found in microorganism after the PDT application.

| Microorganism      | Photosensitizer      | p-value | CI (95%)    | r (Pearson) | R <sup>2</sup> | Power (95%) |
|--------------------|----------------------|---------|-------------|-------------|----------------|-------------|
| <i>C. acnes</i>    | <i>S. splendida</i>  | 0.3811  | -0.58; 0.92 | 0.4412      | 0.1947         | 0.2045      |
|                    | <i>S. alata</i>      | 0.0359  | 0.09; 0.98  | 0.8409      | 0.7071         | 0.6828      |
| <i>C. albicans</i> | <i>S. macrantera</i> | 0.0578  | -0.04; 0.98 | 0.7966      | 0.6345         | 0.5457      |
|                    | <i>S. splendida</i>  | 0.0230  | 0.21; 0.99  | 0.8733      | 0.7627         | 0.7543      |
|                    | <i>S. alata</i>      | 0.0638  | -0.07; 0.98 | 0.7859      | 0.6177         | 0.5762      |
| <i>S. aureus</i>   | <i>S. macrantera</i> | 0.0020  | 0.69; 1.00  | 0.9628      | 0.9271         | 0.9633      |
|                    | <i>S. splendida</i>  | 0.0003  | 0.88; 1.00  | 0.9863      | 0.9727         | 0.9961      |
|                    | <i>S. alata</i>      | 0.0020  | 0.70; 1.00  | 0.9636      | 0.9285         | 0.9647      |
| <i>S. mutans</i>   | <i>S. macrantera</i> | 0.4230  | -0.60; 0.92 | 0.4071      | 0.1657         | 0.1844      |
|                    | <i>S. splendida</i>  | 0.2415  | -0.45; 0.94 | 0.5661      | 0.3204         | 0.2968      |
|                    | <i>S. alata</i>      | 0.3661  | -0.57; 0.92 | 0.4537      | 0.2058         | 0.2122      |

CI: confidence interval; r: correlation coefficient; R<sup>2</sup>: determination coefficient. P-value <0.05 was considered as statistical significance
