# Supplementary material for: 悪性黒色腫に対するBCG療法 (癌のBCG免疫療法〔特集〕)
Source: MDPI journal article supplement (doi:10.3390/pharmaceutics15010181), 1978-08-01
Supplement: s1 [file s1]

**Supplementary Table S4.** Summary of results from two-way ANOVA to each microorganism cultured on biofilm and studied natural substance.

| Characteristics    | Study groups                                                                                                 |             |             |             |             |         | Study groups                                                                                                |             |             |             |             |         |
|--------------------|--------------------------------------------------------------------------------------------------------------|-------------|-------------|-------------|-------------|---------|-------------------------------------------------------------------------------------------------------------|-------------|-------------|-------------|-------------|---------|
|                    | Log-reduction of biofilm after PDT with plant extracts (0.05 mg/mL) mean ± standard deviation (log CFU / mL) |             |             |             |             |         | Log-reduction of biofilm after PDT with plant extracts (0.5 mg/mL) mean ± standard deviation (log CFU / mL) |             |             |             |             |         |
|                    | Control                                                                                                      | PS-Light    | PS+Light    | VC-Light    | VC+Light    | p-value | Control                                                                                                     | PS-Light    | PS+Light    | VC-Light    | VC+Light    | p-value |
| <b>C. albicans</b> |                                                                                                              |             |             |             |             |         |                                                                                                             |             |             |             |             |         |
| S. macranthera     | 0.04 ± 0.02                                                                                                  | 0.00 ± 0.02 | 7.70 ± 0.02 | 0.05 ± 0.03 | 0.07 ± 0.04 | <0.0001 | 0.08 ± 0.02                                                                                                 | 0.01 ± 0.03 | 7.69 ± 0.03 | 0.06 ± 0.04 | 0.08 ± 0.02 | <0.0001 |
| S. splendida       | 0.04 ± 0.03                                                                                                  | 0.02 ±0.02  | 7.70 ± 0.02 | 0.05 ± 0.03 | 0.07 ± 0.04 |         | 0.08 ± 0.02                                                                                                 | 0.02 ± 0.03 | 7.69 ± 0.03 | 0.07 ± 0.04 | 0.08 ± 0.02 |         |
| S. reticulata      | 0.04 ± 0.02                                                                                                  | 0.02 ±0.02  | 7.70 ± 0.02 | 0.05 ± 0.03 | 0.07 ± 0.04 |         | 0.08 ± 0.02                                                                                                 | 0.02 ± 0.03 | 7.69 ± 0.03 | 0.06 ± 0.04 | 0.08 ± 0.02 |         |
| <b>C. acnes</b>    |                                                                                                              |             |             |             |             |         |                                                                                                             |             |             |             |             |         |
| S. macranthera     | 0.02 ± 0.03                                                                                                  | 0.04 ± 0.04 | 0.05 ± 0.04 | 0.06 ±0.03  | 0.04 ± 0.02 | 0.0026  | 0.06 ± 0.04                                                                                                 | 0.09 ± 0.03 | 0.11 ± 0.03 | 0.22 ± 0.03 | 0.21 ± 0.04 | <0.0001 |
| S. splendida       | 0.02 ± 0.03                                                                                                  | 0.12 ± 0.03 | 0.00 ± 0.05 | 0.06 ±0.03  | 0.04 ± 0.02 |         | 0.06 ± 0.04                                                                                                 | 0.14 ± 0.05 | 1.10 ± 0.05 | 0.22 ± 0.03 | 0.21 ± 0.04 |         |
| S. reticulata      | 0.02 ± 0.03                                                                                                  | 0.09 ± 0.03 | 0.03 ± 0.05 | 0.06 ±0.03  | 0.04 ± 0.02 |         | 0.06 ± 0.04                                                                                                 | 0.14 ± 0.07 | 1.03 ± 0.04 | 0.22 ± 0.03 | 0.21 ± 0.04 |         |
| <b>E.coli</b>      |                                                                                                              |             |             |             |             |         |                                                                                                             |             |             |             |             |         |
| S. macranthera     | 0.02 ± 0.02                                                                                                  | 0.01 ± 0.03 | 0.02 ± 0.03 | 0.20 ± 0.01 | 0.23 ± 0.04 | <0.0001 | 0.05 ± 0.03                                                                                                 | 0.01 ± 0.03 | 0.01 ± 0.05 | 0.18 ± 0.03 | 0.18 ± 0.02 | <0.0001 |
| S. splendida       | 0.02 ± 0.02                                                                                                  | 0.05 ± 0.05 | 0.08 ± 0.03 | 0.20 ± 0.01 | 0.23 ± 0.04 |         | 0.05 ± 0.03                                                                                                 | 0.03 ± 0.04 | 0.05 ± 0.04 | 0.18 ± 0.03 | 0.18 ± 0.02 |         |
| S. reticulata      | 0.02 ± 0.02                                                                                                  | 0.03 ± 0.04 | 0.06 ± 0.05 | 0.20 ± 0.01 | 0.23 ± 0.04 |         | 0.05 ± 0.03                                                                                                 | 0.04 ± 0.03 | 0.02 ± 0.04 | 0.18 ± 0.03 | 0.18 ± 0.02 |         |
| <b>S. aureus</b>   |                                                                                                              |             |             |             |             |         |                                                                                                             |             |             |             |             |         |
| S. macranthera     | 0.10 ± 0.04                                                                                                  | 0.02 ± 0.02 | 0.05 ± 0.02 | 0.01 ± 0.02 | 0.04 ± 0.02 | <0.0001 | 0.17 ± 0.04                                                                                                 | 0.02 ± 0.04 | 1.08 ± 0.05 | 0.01 ± 0.04 | 0.03 ± 0.03 | <0.0001 |
| S. splendida       | 0.10 ± 0.04                                                                                                  | 0.02 ± 0.03 | 0.03 ± 0.03 | 0.01 ± 0.02 | 0.04 ± 0.02 |         | 0.17 ± 0.04                                                                                                 | 0.04 ± 0.02 | 1.20 ± 0.03 | 0.01 ± 0.04 | 0.03 ± 0.03 |         |
| S. reticulata      | 0.10 ± 0.04                                                                                                  | 0.07 ± 0.03 | 0.02 ± 0.03 | 0.01 ± 0.02 | 0.04 ± 0.02 |         | 0.17 ± 0.04                                                                                                 | 0.08 ± 0.04 | 0.94 ± 0.03 | 0.01 ± 0.04 | 0.03 ± 0.03 |         |
| <b>S. mutans</b>   |                                                                                                              |             |             |             |             |         |                                                                                                             |             |             |             |             |         |
| S. macranthera     | 0.05 ± 0.02                                                                                                  | 0.01 ± 0.04 | 0.01 ± 0.03 | 0.07 ± 0.03 | 0.07 ± 0.03 | <0.0001 | 0.05 ± 0.04                                                                                                 | 0.06 ± 0.05 | 0.09 ± 0.04 | 0.08 ± 0.04 | 0.07 ± 0.03 | <0.0001 |
| S. splendida       | 0.05 ± 0.02                                                                                                  | 0.01 ± 0.04 | 0.78 ± 0.04 | 0.07 ± 0.03 | 0.07 ± 0.03 |         | 0.05 ± 0.04                                                                                                 | 0.05 ± 0.06 | 2.08 ± 0.03 | 0.08 ± 0.04 | 0.07 ± 0.03 |         |
| S. reticulata      | 0.05 ± 0.02                                                                                                  | 0.02 ± 0.02 | 0.76 ± 0.02 | 0.07 ± 0.03 | 0.07 ± 0.03 |         | 0.05 ± 0.04                                                                                                 | 0.03 ± 0.04 | 1.82 ± 0.04 | 0.08 ± 0.04 | 0.07 ± 0.03 |         |

PS-Light: photosensitizer without light; PS+Light: photosensitizer with light; VC-Light: vehicle control without light; VC+Light: vehicle control with light; p<0.05 means significant statistical difference
