# Supplementary material for: 悪性黒色腫に対するBCG療法 (癌のBCG免疫療法〔特集〕)
Source: MDPI journal article supplement (doi:10.3390/pharmaceutics15010181), 1978-08-01
Supplement: s1 [file s1]

**Supplementary Table S3.** Summary of results from two-way ANOVA followed by confidence interval estimation to each microorganism cultured on suspension and studied natural substance.

| Characteristics         | Study groups                                    |             |             |             |             | P      |
|-------------------------|-------------------------------------------------|-------------|-------------|-------------|-------------|--------|
|                         | Mean ± Confidence Interval (95%) (log CFU / mL) |             |             |             |             |        |
|                         | Control                                         | PS-Light    | PS+Light    | VC-Light    | VC+Light    |        |
| <i>C. albicans</i>      |                                                 |             |             |             |             |        |
| <i>Senna macrantera</i> | 5.932±0.023                                     | 5.899±0.018 | 0.000±0.018 | 5.891±0.025 | 5.884±0.025 |        |
| <i>Senna splendida</i>  | 5.932±0.023                                     | 5.903±0.018 | 0.000±0.018 | 5.891±0.025 | 5.884±0.025 | <0.001 |
| <i>Senna reticulata</i> | 5.931±0.025                                     | 5.906±0.017 | 0.000±0.018 | 5.891±0.025 | 5.884±0.025 |        |
| <i>C. acnes</i>         |                                                 |             |             |             |             |        |
| <i>Senna macrantera</i> | 8.100±0.040                                     | 7.941±0.040 | 6.783±0.040 | 7.932±0.040 | 7.921±0.040 |        |
| <i>Senna splendida</i>  | 7.988±0.040                                     | 7.767±0.038 | 0.000±0.038 | 7.932±0.038 | 7.903±0.038 | <0.001 |
| <i>Senna reticulata</i> | 7.988±0.040                                     | 6.746±0.038 | 0.000±0.038 | 7.932±0.038 | 7.903±0.038 |        |
| <i>E. coli</i>          |                                                 |             |             |             |             |        |
| <i>Senna macrantera</i> | 8.908±0.025                                     | 8.828±0.020 | 8.825±0.020 | 8.856±0.028 | 8.902±0.028 |        |
| <i>Senna splendida</i>  | 8.908±0.025                                     | 8.851±0.020 | 8.836±0.020 | 8.856±0.028 | 8.902±0.028 | <0.001 |
| <i>Senna reticulata</i> | 8.908±0.025                                     | 8.839±0.020 | 8.810±0.020 | 8.856±0.028 | 8.902±0.028 |        |
| <i>S. aureus</i>        |                                                 |             |             |             |             |        |
| <i>Senna macrantera</i> | 6.922±0.029                                     | 6.870±0.022 | 0.000±0.022 | 6.952±0.031 | 6.914±0.031 |        |
| <i>Senna splendida</i>  | 6.922±0.029                                     | 7.569±0.022 | 0.000±0.022 | 6.952±0.031 | 6.914±0.031 | <0.001 |
| <i>Senna reticulata</i> | 6.922±0.029                                     | 7.708±0.022 | 4.675±0.022 | 6.952±0.031 | 6.914±0.031 |        |

Legend. PS-Light: photosensitizer without light; PS+Light: photosensitizer with light; VC-Light: vehicle control without light; VC+Light: vehicle control with light; p<0.05 means significant statistical difference

**Supplementary Table S3. Continue.** Summary of results from ANOVA TWO-WAY followed by confidence interval estimation to each microorganism and studied natural substance.

| Characteristics         | Study groups                                    |             |             |             |             | P      |
|-------------------------|-------------------------------------------------|-------------|-------------|-------------|-------------|--------|
|                         | Mean ± Confidence Interval (95%) (log CFU / mL) |             |             |             |             |        |
|                         | Control                                         | PS-Light    | PS+Light    | VC-Light    | VC+Light    |        |
| <i>S.mutans</i>         |                                                 |             |             |             |             |        |
| <i>Senna</i>            | 8.027±0.021                                     | 7.872±0.021 | 4.834±0.021 | 7.987±0.030 | 7.989±0.030 | <0.001 |
| <i>macrantera</i>       |                                                 |             |             |             |             |        |
| <i>Senna splendida</i>  | 8.028±0.023                                     | 7.900±0.021 | 0.000±0.021 | 7.987±0.030 | 7.989±0.030 |        |
| <i>Senna reticulata</i> | 8.028±0.023                                     | 7.926±0.021 | 0.000±0.021 | 7.987±0.030 | 7.989±0.030 |        |

Legend. PS-Light: photosensitizer without light; PS+Light: photosensitizer with light; VC-Light: vehicle control without light; VC+Light: vehicle control with light; p<0.05 means significant statistical difference.
