# Supplementary material for: 悪性黒色腫に対するBCG療法 (癌のBCG免疫療法〔特集〕)
Source: MDPI journal article supplement (doi:10.3390/pharmaceutics15010181), 1978-08-01
Supplement: s1 [file s1]

Supplementary Table S1: General information about plant materials included in the present study

| Family          | Scientific name                                        | Source                  | Voucher n. | Mass yield | Coordinates           |
|-----------------|--------------------------------------------------------|-------------------------|------------|------------|-----------------------|
|                 | <i>Senna splendida</i> (Vogel) H.S.Irwin & Barneby     | Leaves / NUBBE LPNBIO   | 60416      | 6.4%       | S(0513974) W(4053621) |
| <b>Fabaceae</b> | <i>Senna alata</i> (Willd.) H.S.Irwin & Barneby        | Branches / NUBBE LPNBIO | 60420      | 16.3%      | S(0403454) W(3901531) |
|                 | <i>Senna macranthera</i> (Collad.) H.S.Irwin & Barneby | Leaves / NUBBE LPNBIO   | 60422      | 9.8%       | S(0258347) W(3953439) |

NUBBE: Núcleo de Bioensaios, Biosíntese e Ecofisiologia de Produtos naturais, UNESP - Institute of Chemistry, Araraquara. LPNBIO: Laboratório de Produtos Naturais e Química Medicinal, UFC- Federal University of Ceará, Fortaleza, Ceará, Brazil. S: South; W: West.
