# Supplementary material for: 悪性黒色腫に対するBCG療法 (癌のBCG免疫療法〔特集〕)
Source: MDPI journal article supplement (doi:10.3390/pharmaceutics15010181), 1978-08-01
Supplement: s1 [file s1]

**Supplementary Table S2.** Microbial Strains and Growth Conditions.

| Strain             | Culture medium<br>(liquid / solid)        | Incubation conditions       | Inoculum               |
|--------------------|-------------------------------------------|-----------------------------|------------------------|
| <i>C. acnes</i>    | TSB enriched with hemin (5<br>μg/mL)/ RCM | Anaerobiosis at 37 °C/ 24 h | 10 <sup>8</sup> CFU/mL |
| <i>C. albicans</i> | TSB / BHI                                 | Aerobiosis at 37 °C/ 48 h   | 10 <sup>6</sup> CFU/mL |
| <i>E. coli</i>     | TSB / TSA                                 | Aerobiosis at 37 °C/ 24 h   | 10 <sup>7</sup> CFU/mL |
| <i>S. mutans</i>   | BHI /BHI                                  | Anaerobiosis at 37 °C/ 48 h | 10 <sup>7</sup> CFU/mL |
| <i>S. aureus</i>   | TSB / BHI                                 | Aerobiosis at 37 °C/ 24 h   | 10 <sup>8</sup> CFU/mL |

RCM: *Reinforced Clostridium Medium*. TSB: soy tryptone broth. TSA: soy tryptone agar. BHI: brain and heart infusion.
