# Supplementary material for: In Vitro Evaluation of Photodynamic Activity of Plant Extracts from Senna Species against Microorganisms of Medical and Dental Interest
Source: Pharmaceutics. 2023 Jan 4;15(1):181. doi: 10.3390/pharmaceutics15010181 (PMC9861726; doi:10.3390/pharmaceutics15010181)
Supplement: Supplementary file 1 [file pharmaceutics-15-00181-s001.zip]

Archive with 7 entries (7 files):
- Supplementary Figure S1.pdf
- Suppl_Table S1.pdf
- Suppl_Table S2.pdf
- Suppl_Table S3.pdf
- Suppl_Table S4.pdf
- Suppl_Table S5.pdf
- Suppl_Table S6.pdf
