# Supplementary figures and images for: 悪性黒色腫に対するBCG療法 (癌のBCG免疫療法〔特集〕)
Source: MDPI journal article supplement (doi:10.3390/pharmaceutics15010181), 1978-08-01

**Supplementary Figure S1.** Absorption spectrum of plant extracts diluted in DMSO.

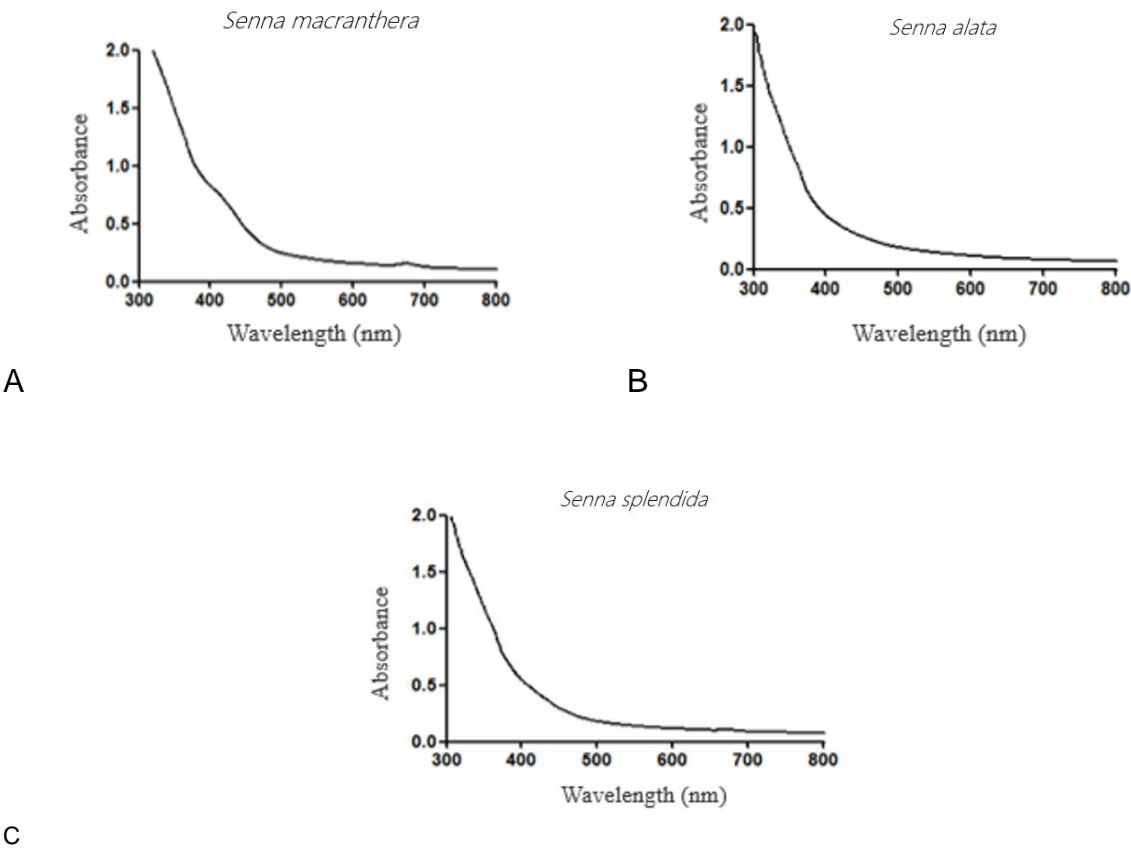

Supplement: s1 [file s1]
